# Supplementary material for: Scalable synthesis of 3D porous germanium encapsulated in nitrogen-doped carbon matrix as an ultra-long-cycle life anode for lithium-ion batteries
Source: Royal Society of Chemistry journal article supplement (doi:10.1039/d1dt00797a), 2021-01-01
Supplement: d1dt00797a1.pdf [file d1dt00797a1.pdf]

Electronic Supplementary Information

**Scalable synthesis of 3D porous germanium encapsulated in nitrogen doped carbon matrix as an ultra-long-cycle life anode for lithium ion batteries**

Xianyu Liu,<sup>a</sup> Yanting Wang,<sup>a</sup> Zheng Liu,<sup>a</sup> Huijuan Wei,<sup>a</sup> Mingguang Ma,<sup>a</sup> Rui Xue,<sup>a</sup>  
Qianliang Zhang<sup>\*b</sup> and Shengying Li<sup>\*a</sup>

<sup>a</sup> School of Chemistry and Chemical Engineering, Institute of Urban Ecology and Environment, Nanomaterials Laboratory, Lanzhou City University, Lanzhou, Gansu 730070, The People's Republic of China.

<sup>b</sup> Key Laboratory of Colloid and Interface Chemistry, Ministry of Education, School of Chemistry and Chemical Engineering, and State Key Laboratory of Crystal Materials, Shandong University, Jinan, Shandong 250100, The People's Republic of China.

Corresponding Author

Qianliang Zhang, E-mail: qianliangzhang@mail.sdu.edu.cn

Shengying Li, E-mail: lisy1966@163.com

**Table S1.** The elemental component content of the resulting 3D porous Ge/NC.

| production        | precurso | C        | N        | Ge       |
|-------------------|----------|----------|----------|----------|
|                   | r ratio  | content  | content  | content  |
| 3D porous Ge/NC-1 | 5:1:1    | 27.8 wt% | 1.2 wt%  | 69.4 wt% |
| 3D porous Ge/NC-2 | 5:2:2    | 54.8 wt% | 1.7 wt%  | 42.8 wt% |
| 3D porous Ge/NC-3 | 5:3:3    | 78.5 wt% | 2.1 wt % | 17.9 wt% |

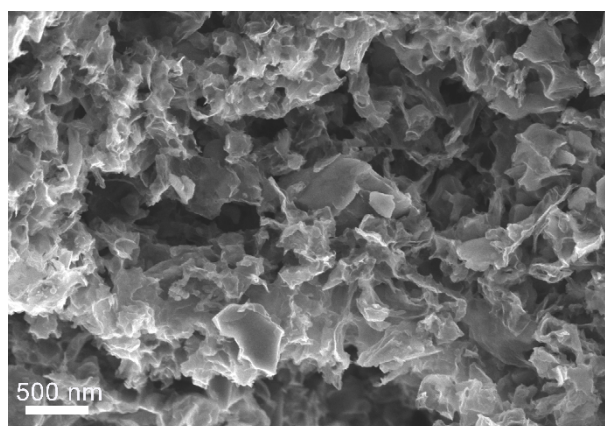

**Fig. S1.** SEM image of the 3D porous Ge/NC nanocomposites.

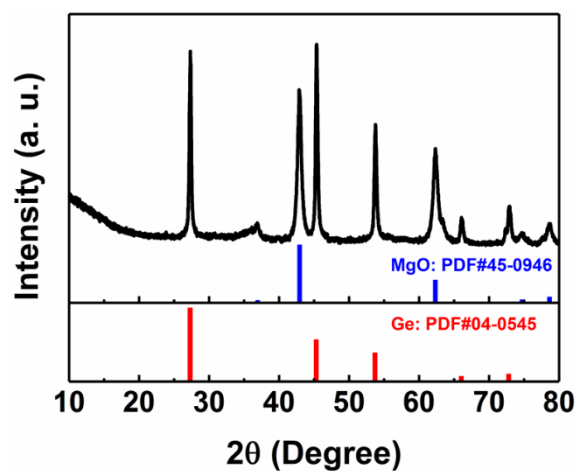

**Fig. S2.** XRD patterns of the obtained raw product without any washing treatment.

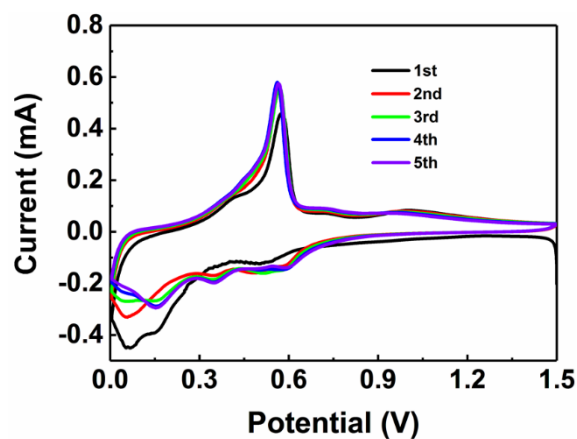

**Fig. S3.** Cyclic voltammetry curves of the prepared 3D porous Ge/NC anodes between 0.01 and 1.50 V with a scan rate of  $0.1 \text{ mV s}^{-1}$ .

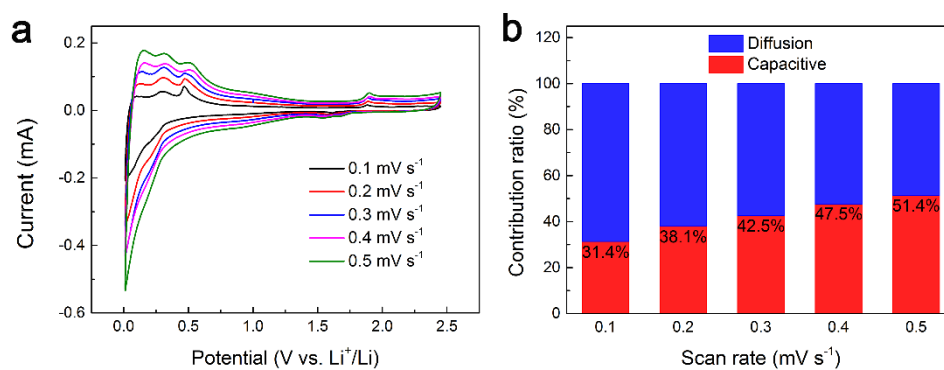

**Fig. S4.** Electrochemical kinetics behavior of the prepared 3D porous Ge/NC anodes.

(a) CV curves at different scan rates from  $0.1$  to  $0.5 \text{ mV s}^{-1}$ . (b) Capacity contribution ratios at different scan rates.

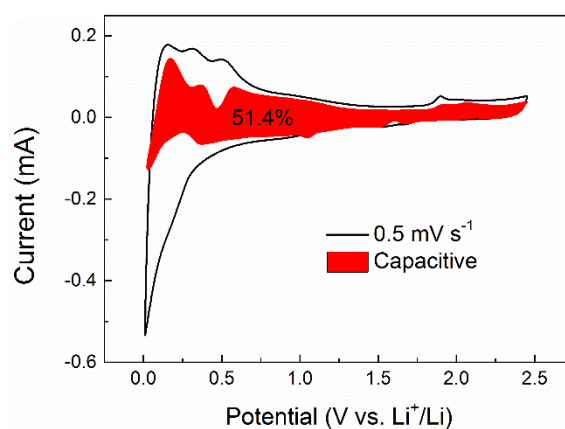

**Fig. S5.** Capacitance separation at  $0.5 \text{ mV s}^{-1}$  for the prepared 3D porous Ge/NC anodes.

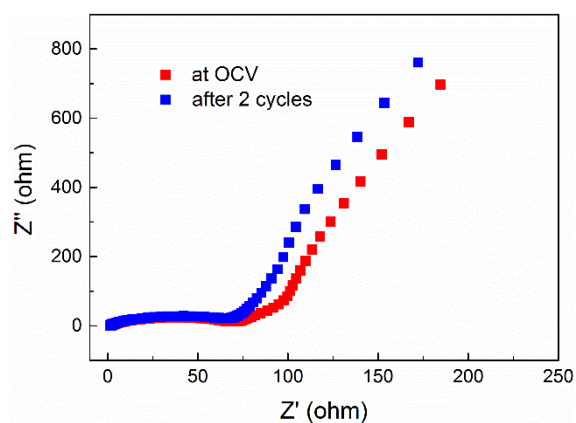

**Fig. S6.** EIS analysis at the states of open circuit voltage and after 2 cycles of the prepared 3D porous Ge/NC anodes.

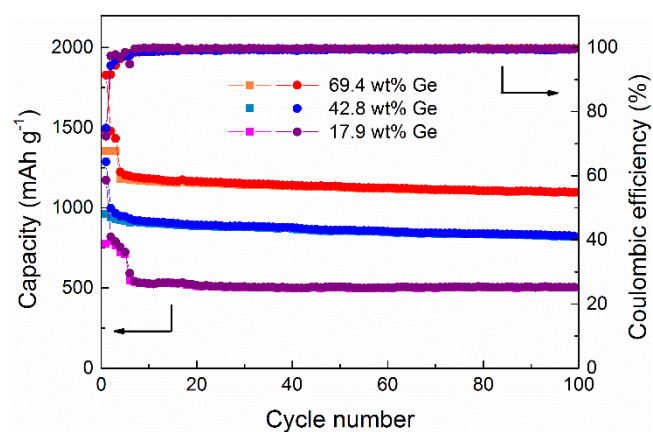

**Fig. S7.** Cycle performance of the prepared 3D porous Ge/NC electrodes with different Ge content at 0.8 A g<sup>-1</sup>.

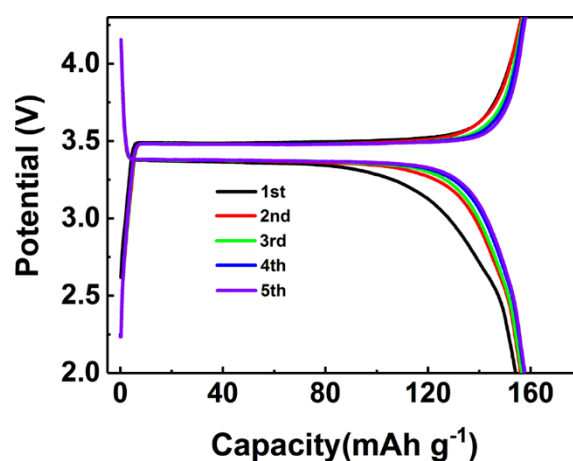

**Fig. S8.** Typical galvanostatic discharge-charge curves for the first five cycles of the LiFePO<sub>4</sub> cathode in the potential range of 2.0-4.3 V versus Li/Li<sup>+</sup> at 170 mA g<sup>-1</sup>.

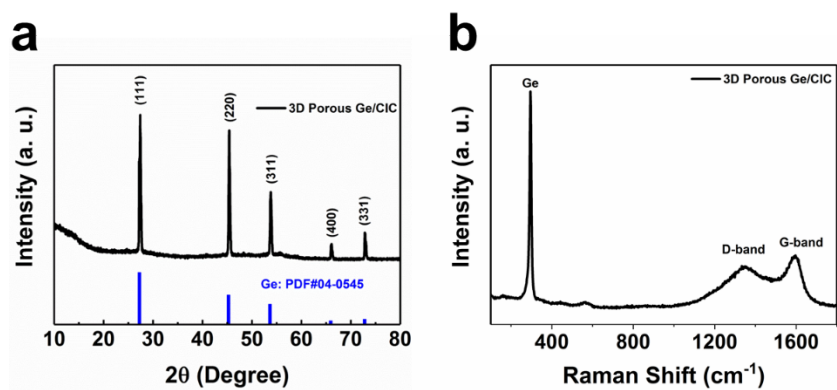

**Fig. S9.** XRD patterns (a) and Raman spectra (b) of the 3D porous Ge/CIC nanocomposites.

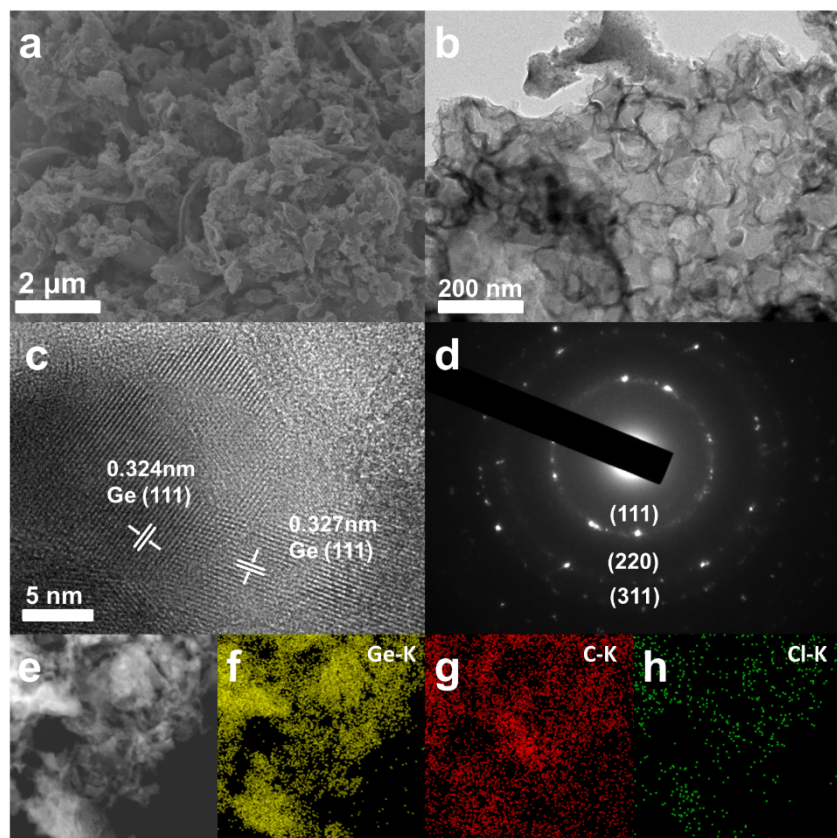

**Fig. S10.** (a) SEM, (b) TEM, (c) HRTEM, and (d) SAED images of the 3D porous Ge/CIC nanocomposites. The corresponding EDX elemental mapping images of (f) Ge, (g) C and (h) Cl in the selected area (e).

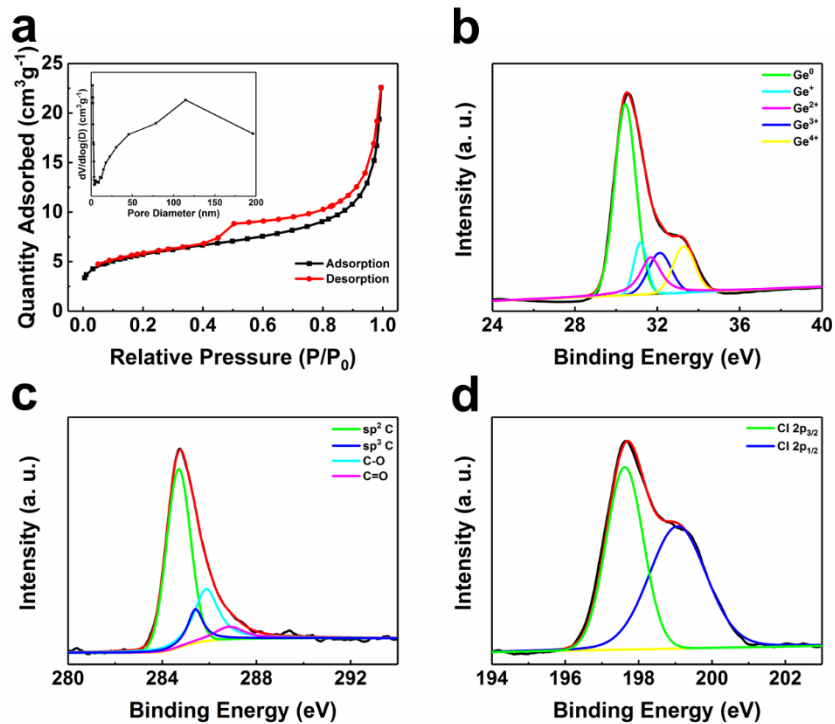

**Fig. S11.** (a)  $N_2$  adsorption-desorption isotherms, the pore-size distribution calculated from the desorption branch (inset) of the 3D porous Ge/CIC; (b), (c) and (d) are the high resolution XPS spectra of Ge 3d, C 1s and Cl 2p in the 3D porous Ge/CIC nanocomposites.
